# Supplementary material for: Genotype and phenotype correlation in a cohort of Chinese congenital hypothyroidism patients with DUOX2 mutations
Source: PubMed Central journal article supplement — Ann Transl Med. 2020 Dec;8(24):1649. doi: 10.21037/atm-20-7165 (PMC7812163; doi:10.21037/atm-20-7165), 2020-12
Supplement: atm-08-24-1649-dss.pdf [file atm-08-24-1649-dss.pdf]

## Data Sharing Statement

|                     |                                                                                                                                                     |                                                            |
|---------------------|-----------------------------------------------------------------------------------------------------------------------------------------------------|------------------------------------------------------------|
| <b>Article Info</b> | <a href="http://dx.doi.org/10.21037/atm-20-7165">http://dx.doi.org/10.21037/atm-20-7165</a>                                                         |                                                            |
| <b>Item</b>         | <b>Question</b>                                                                                                                                     | <b>Authors' Response<br/>(place "-" if not applicable)</b> |
| 1                   | Would you like to share data collected for your study to others?                                                                                    | Yes.                                                       |
| 2                   | If not, would you like to share the reason for your decision?                                                                                       | -                                                          |
| 3                   | What data in particular will be shared?                                                                                                             | The information of the pathogenic variants.                |
| 4                   | Any other documents will be shared? Such as study protocol, statistical analysis plan, informed consent form, clinical study report, analytic code. | No.                                                        |
| 5                   | When will data availability begin?                                                                                                                  | The date of the article received.                          |
| 6                   | When will data availability end?                                                                                                                    | 3 years after publication.                                 |
| 7                   | To whom will you share the data?                                                                                                                    | Clinical researchers.                                      |
| 8                   | For what type of analysis or purpose?                                                                                                               | Clinical diagnosis or guidelines.                          |
| 9                   | How or where can the data/documents be obtained?                                                                                                    | Email to <b>Correspondence author</b><br>Wei_lu77@163.com  |
| 10                  | Any other restrictions?                                                                                                                             | No.                                                        |
